# Supplementary figures and images for: Deswelling behaviour of ionic microgel particles from low to ultra-high densities
Source: Royal Society of Chemistry journal article supplement (doi:10.1039/c8sm00390d), 2018-01-01

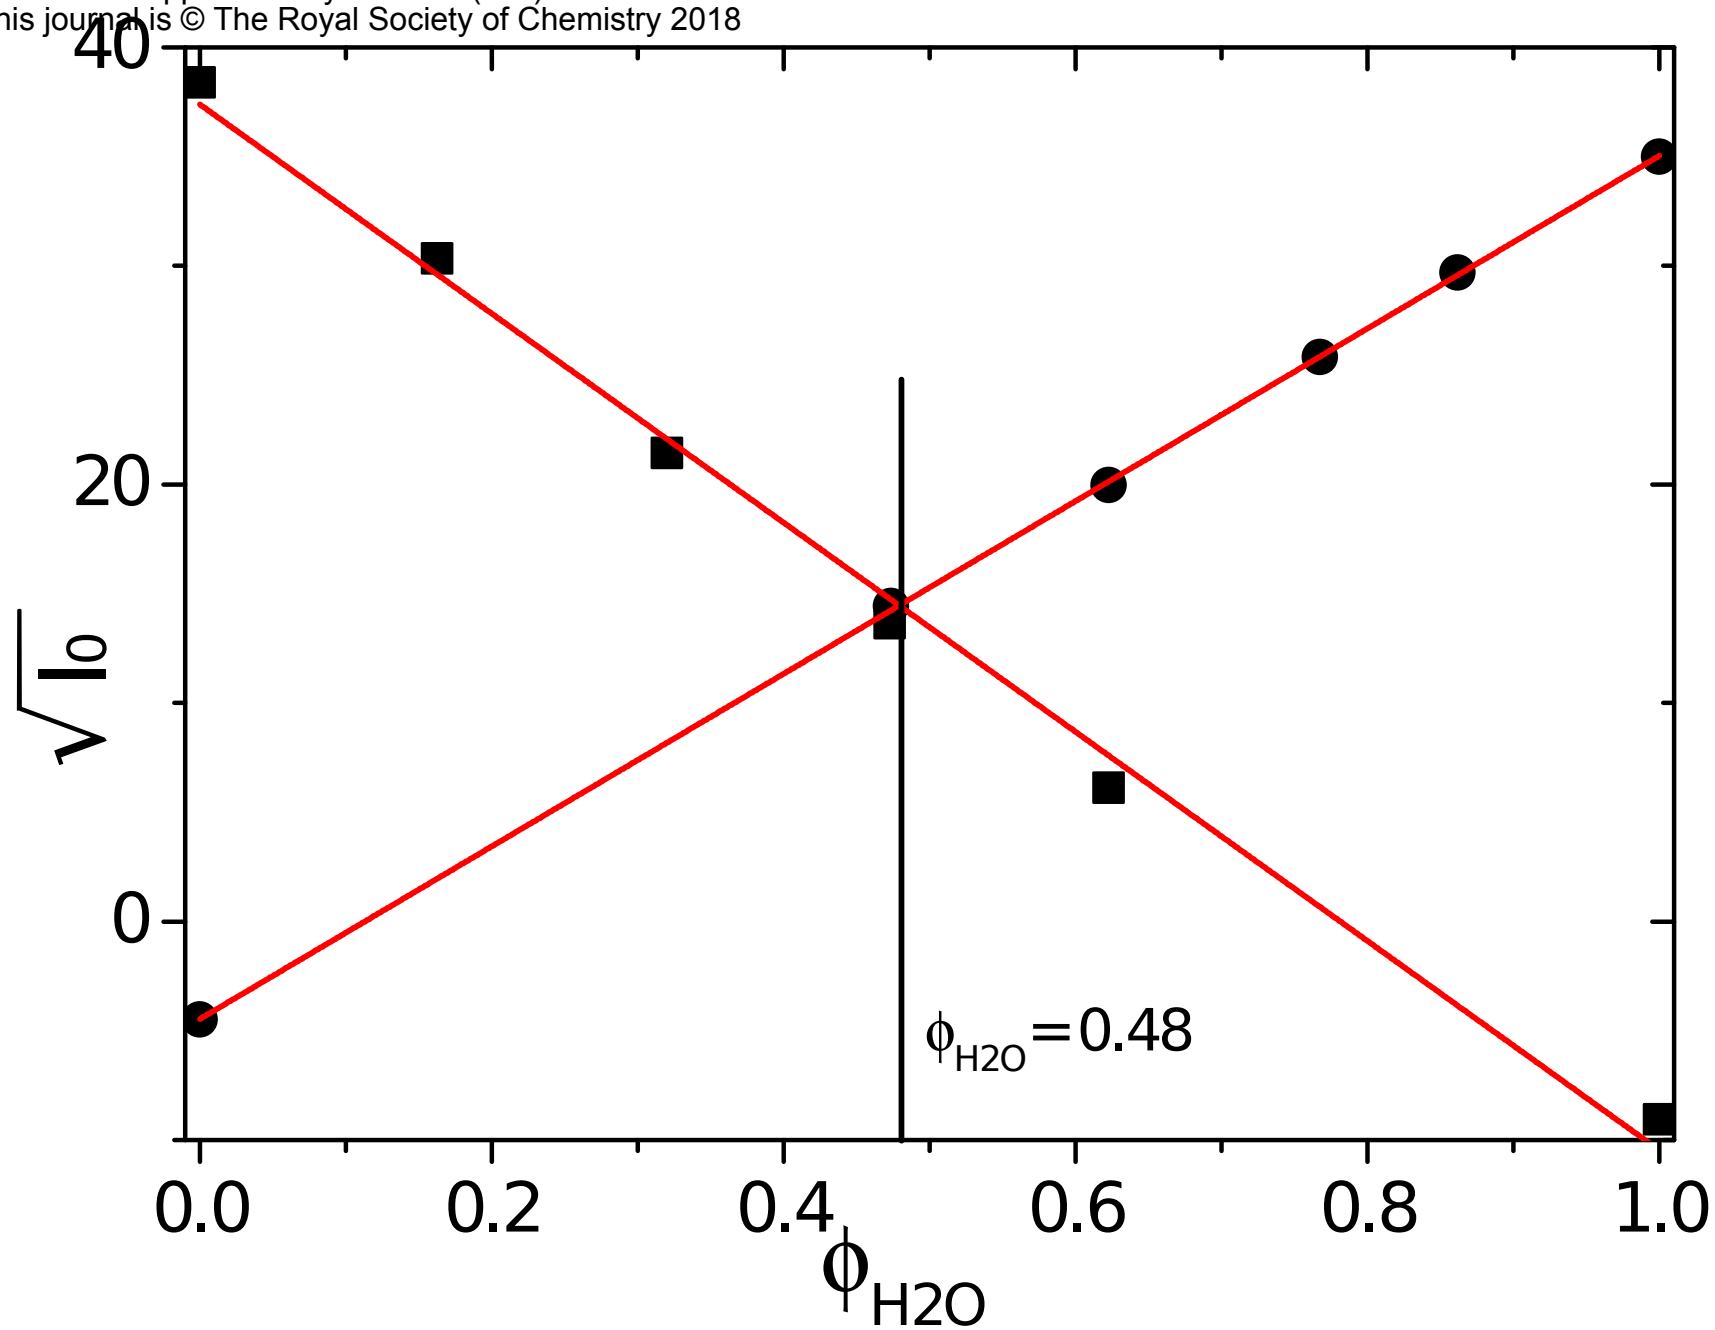

Supplement: c8sm00390d2.pdf [file c8sm00390d2.pdf]

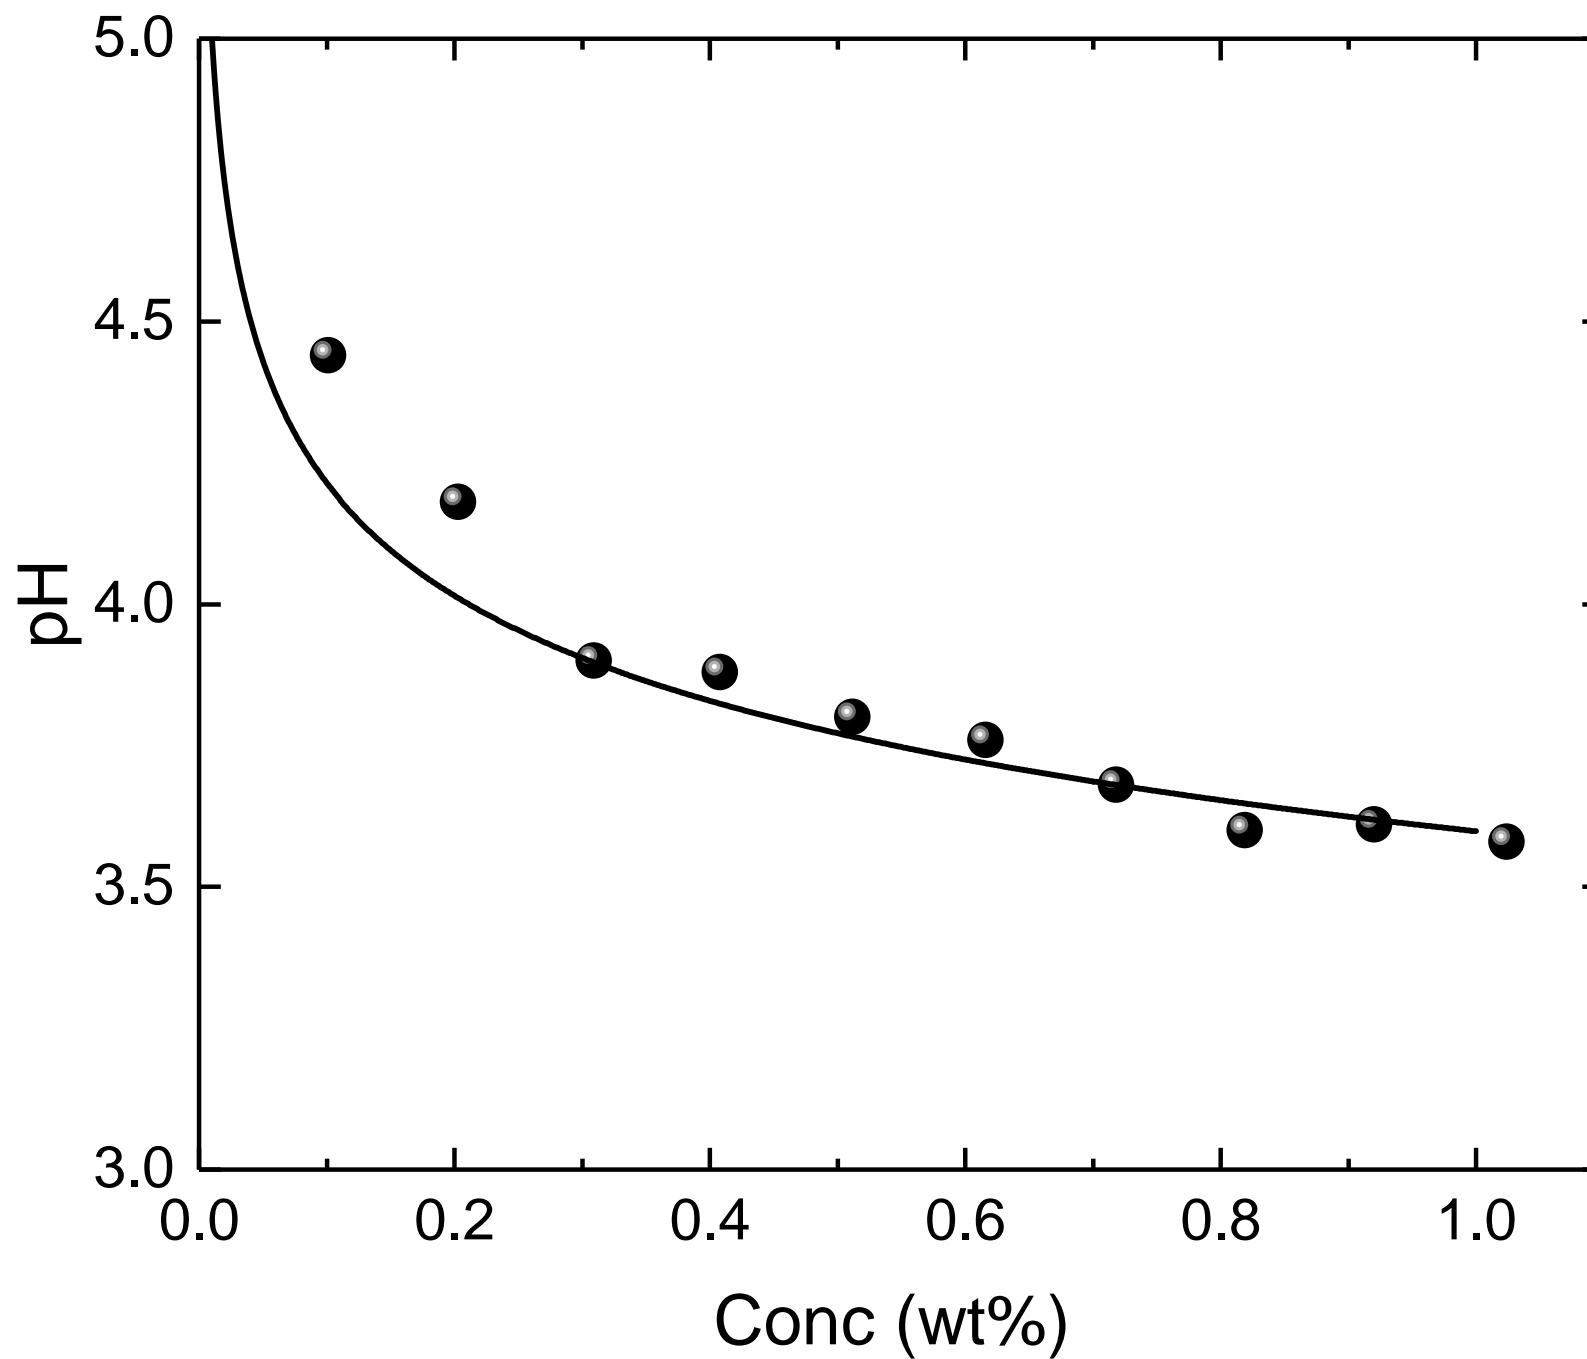

Supplement: c8sm00390d3.pdf [file c8sm00390d3.pdf]
